# Supplementary material for: Measuring professional stigma towards patients with a forensic mental health status: protocol for a Delphi consensus study on the design of a questionnaire
Source: HighWire-hosted journal article supplement (doi:10.1136/bmjopen-2022-061160), 2022-09-01
Supplement: bmjopen-2022-061160supp001_data_supplement.pdf [file bmjopen-2022-061160supp001_data_supplement.pdf]

## Supplementary Material – Identified questionnaires and selection and modification of relevant items

| Questionnaire                                                   | Total items | Number of items selected | Original item                                                                                            | Modified item                                                                                     |
|-----------------------------------------------------------------|-------------|--------------------------|----------------------------------------------------------------------------------------------------------|---------------------------------------------------------------------------------------------------|
| <b>Attitudes Towards Acute Mental Health Scale (ATAMHS)</b> [1] | 33          | 2                        | Mental illness is the result of adverse social circumstances                                             | N/A                                                                                               |
|                                                                 |             |                          | Violence mostly results from mental illness                                                              | N/A                                                                                               |
| <b>Attitudes toward Mental Illness (AMI)</b> [2]                | 24          | 4                        | The mentally ill, with a number of exceptions, cannot tell the difference between good and bad           | FMH patients, with a number of exceptions, cannot tell the difference between good and bad        |
|                                                                 |             |                          | Mentally ill people should be prevented from walking freely in public places                             | FMH patients should be prevented from walking freely in public places                             |
|                                                                 |             |                          | The mentally ill should not be allowed to make decisions, even those concerning routine events           | FMH patients should not be allowed to make decisions, even those concerning routine events        |
|                                                                 |             |                          | Every mentally ill person should be in an institution where he/she will be under supervision and control | Every FMH patients should be in an institution where he/she will be under supervision and control |
| <b>Attitudes Toward Prisoners (ATP)</b> [3]                     | 36          | 14 <sup>a</sup>          | Only a few prisoners are really dangerous*                                                               | Only a few FMH patients are really dangerous*                                                     |
|                                                                 |             |                          | Prisoners never change                                                                                   | FMH patients never change                                                                         |
|                                                                 |             |                          | Most prisoners are victims of circumstance and deserve to be helped*                                     | Most FMH patients are victims of circumstance and deserve to be helped*                           |
|                                                                 |             |                          | Prisoners have feelings like the rest of us*                                                             | FMH patients have feelings like the rest of us*                                                   |

|    |   |                                                                                                            |                                                                                       |
|----|---|------------------------------------------------------------------------------------------------------------|---------------------------------------------------------------------------------------|
|    |   | It is not wise to trust a prisoner too far                                                                 | It is not wise to trust a FMH patient too far                                         |
|    |   | Prisoners need affection and praise just like anybody else*                                                | FMH patients need affection and praise just like anybody else*                        |
|    |   | Trying to rehabilitate prisoners is a waste of time and money                                              | Trying to rehabilitate FMH patients is a waste of time and money                      |
|    |   | You have to be constantly on your guard with prisoners                                                     | You have to be constantly on your guard with FMH patients                             |
|    |   | Most prisoners are too lazy to earn an honest living                                                       | Most FMH patients are too lazy to earn an honest living                               |
|    |   | Prisoners are just plain mean at heart                                                                     | FMH patients are just plain mean at heart                                             |
|    |   | Prisoners are just plain immoral                                                                           | FMH patients are just plain immoral                                                   |
|    |   | Prisoners should be under strict, harsh discipline                                                         | FMH patients should be under strict, harsh discipline                                 |
|    |   | Most prisoners can be rehabilitated*                                                                       | FMH patients can be rehabilitated*                                                    |
|    |   | If a person does well in prison, he should be let out on parole                                            | If a FMH patient does well in CMHCare, he should be let out in the community          |
|    |   |                                                                                                            | If a FMH patient does well in FMHCare, he should be transferred to CMHCare            |
| 30 | 3 | In spite of any efforts they are making, people with severe mental illness will never be like other people | In spite of any efforts they are making, FMH patients will never be like other people |

|                                                                |    |   |                                                                                                                      |                                                                                                                            |
|----------------------------------------------------------------|----|---|----------------------------------------------------------------------------------------------------------------------|----------------------------------------------------------------------------------------------------------------------------|
| <b>Attitudes toward Severe Mental Illness</b><br>(ASMI)[4]     |    |   | People with severe mental illness are not able to acquire new skills                                                 | FMH patients are not able to acquire new skills                                                                            |
|                                                                |    |   | People with severe mental illness can cope with life difficulties*                                                   | FMH patients can cope with life difficulties*                                                                              |
| <b>Believes toward Mental Illness Scale</b><br>(BMI)[5]        | 21 | 3 | A mentally ill person is more likely to harm others than a normal person                                             | A FMH patient is more likely to harm others than a non-forensic patient with a mental illness                              |
|                                                                |    |   | Mental disorders would require a much longer period of time to be cured than would other general diseases            | FMH patients would require a much longer period of time to be cured than would non-forensic patients with a mental illness |
|                                                                |    |   | Mentally-ill people are unlikely to be able to live by themselves because they are unable to assume responsibilities | FMH patients are unlikely to be able to live by themselves because they are unable to assume responsibilities              |
| <b>Community Attitudes Towards Mental Illness</b><br>(CAMI)[6] | 40 | 8 | One of the main causes of mental illness is a lack of self-discipline and will power                                 | One of the main causes of becoming a FMH patient is a lack of self-discipline and will power                               |
|                                                                |    |   | The mentally ill should not be treated as outcasts of society*                                                       | FMH patients should not be treated as outcasts of society*                                                                 |
|                                                                |    |   | Virtually anyone can become mentally ill*                                                                            | Virtually anyone can become a FMH patient*                                                                                 |
|                                                                |    |   | We need to adopt a far more tolerant attitude toward the mentally ill in our society*                                | We need to adopt a far more tolerant attitude toward FMH patients in our society*                                          |
|                                                                |    |   | We have a responsibility to provide the best possible care for the mentally ill*                                     | We have a responsibility to provide the best possible care for FMH patients*                                               |
|                                                                |    |   | The mentally ill should not be given any responsibility                                                              | FMH patients should not be given any responsibility                                                                        |

|                                                                                                           |    |   |                                                                                                                      |                                                                                                                                        |
|-----------------------------------------------------------------------------------------------------------|----|---|----------------------------------------------------------------------------------------------------------------------|----------------------------------------------------------------------------------------------------------------------------------------|
|                                                                                                           |    |   | The mentally ill should be isolated from the rest of the community                                                   | FMH patients should be isolated from the rest of the community                                                                         |
|                                                                                                           |    |   | As far as possible, mental health services should be provided through community based facilities                     | As far as possible, FMHCare should be provided through community based facilities                                                      |
| <b>Community attitudes toward sex offenders</b> (CATSO)[7]                                                | 18 | 2 | With support and therapy, someone who committed a sexual offense can learn to change their behaviour*                | With support and therapy, a FMH patient can learn to change their behaviour*                                                           |
|                                                                                                           |    |   | The prison sentences sex offenders receive are much too long when compared to the sentence lengths for other crimes* | The prison sentences FMH patients receive are much too short when compared to the sentence lengths for those without a mental illness* |
| <b>Escala de Estigma y Salud Mental</b> (EESMPR) [Mental Health Stigma Scale][8]                          | 12 | - |                                                                                                                      |                                                                                                                                        |
| <b>Evaluación del Estigma de Enfermedad Mental en Enfermería</b> (EVEPEM) [Evaluation of Stigma of Mental | 20 | 9 | People with a mental disorder are a burden on their family and society                                               | FMH patients are a burden on their family and society                                                                                  |
|                                                                                                           |    |   | People with a mental disorder are more likely to behave violently than are other people                              | FMH patients are more likely to behave violently than are other people                                                                 |
|                                                                                                           |    |   | In general, people with a mental disorder refuse therapeutic help                                                    | In general, FMH patients refuse therapeutic help                                                                                       |
|                                                                                                           |    |   | People with a mental disorder can lead a normal life*                                                                | FMH patients can lead a normal life*                                                                                                   |

|                                                                            |    |   |                                                                                                                                   |                                                                                                          |
|----------------------------------------------------------------------------|----|---|-----------------------------------------------------------------------------------------------------------------------------------|----------------------------------------------------------------------------------------------------------|
| Illness in Nursing][9]                                                     |    |   | Patients with a mental disorder have the same rights as everybody*                                                                | FMH patients have the same rights as everybody*                                                          |
|                                                                            |    |   | I feel afraid when caring for people with a mental disorder                                                                       | I feel afraid when caring for FMH patients                                                               |
|                                                                            |    |   | Patients with a mental disorder should be isolated from other patients                                                            | FMH patients should be isolated from other patients                                                      |
|                                                                            |    |   | All patients with a mental disorder end up being readmitted                                                                       | All FMH patients end up being readmitted                                                                 |
|                                                                            |    |   | All patients admitted to a mental health unit need to be physically restrained                                                    | All FMH patients admitted to a mental health unit need to be physically restrained                       |
| <b>Mental Health Attitude Questionnaire (MHAQ)[10]</b>                     | 21 | - |                                                                                                                                   |                                                                                                          |
| <b>Mental Health Provider Self-Assessment of Stigma Scale (MHPASS)[11]</b> | 20 | 1 | Clients with serious mental illnesses have a hard time making good choices for themselves, so service providers need to help them | FMH patients have a hard time making good choices for themselves, so service providers need to help them |
| <b>Mental Illness Attitudes Questionnaire [12]</b>                         | 30 | 7 | Mental illness patients often threaten or harm the people around                                                                  | FMH patients often threaten or harm the people around them                                               |
|                                                                            |    |   | Mental illness patients often lose their temper with no reason                                                                    | FMH patients often lose their temper with no reason                                                      |

|                                                                                |    |   |                                                                                                                 |                                                                                                                |
|--------------------------------------------------------------------------------|----|---|-----------------------------------------------------------------------------------------------------------------|----------------------------------------------------------------------------------------------------------------|
|                                                                                |    |   | Mental illness patients often show unexpected impulsive behaviours                                              | FMH patients often show unexpected impulsive behaviours                                                        |
|                                                                                |    |   | Violence of mental illness patients is as much as that of others                                                | Violence of FMH patients is as much as that of other patients with a mental illness                            |
|                                                                                |    |   | Mental illness patients can contribute to society*                                                              | FMH patients can contribute to society*                                                                        |
|                                                                                |    |   | Mental illness patients violate social and moral rules as much as other people do                               | FMH patients violate social and moral rules as much as other people do                                         |
|                                                                                |    |   | Discharged mental illness patients should be allowed to return to society*                                      | Discharged FMH patients should be allowed to return to society*                                                |
| <b>Mental Illness: Clinicians' Attitudes</b><br>(MICA <sub>v4</sub> )[13, 14]  | 16 | 2 | People with severe mental illness can never recover enough to have a good quality of life                       | FMH patients can never recover enough to have a good quality of life                                           |
|                                                                                |    |   | I feel as comfortable talking to a person with mental illness as I do talking to a person with physical illness | I feel as comfortable talking to a FMH patient as I do talking to a non-forensic patient with a mental illness |
| <b>Opening Mind Stigma Scale for Health Care Practitioners</b><br>(OMS-HC)[15] | 20 | 5 | Despite my professional beliefs, I have negative reactions towards people who have mental illness               | Despite my professional beliefs, I have negative reactions towards FMH patients                                |
|                                                                                |    |   | There is little I can do to help people with mental illness                                                     | There is little I can do to help FMH patients                                                                  |
|                                                                                |    |   | More than half of people with mental illness don't try hard enough to get better                                | More than half of FMH patients don't try hard enough to get better                                             |
|                                                                                |    |   | The best treatment for mental illness is medication                                                             | The best treatment for FMH patients is medication                                                              |

|                                                                               |    |   |                                                                                                                                               |                                                                                                                                                   |
|-------------------------------------------------------------------------------|----|---|-----------------------------------------------------------------------------------------------------------------------------------------------|---------------------------------------------------------------------------------------------------------------------------------------------------|
|                                                                               |    |   | I struggle to feel compassion for a person with a mental illness                                                                              | I struggle to feel compassion for a FMH patient                                                                                                   |
| <b>Opinions About Mental Illness</b><br>(OMI)[16]                             | 51 | 5 | To become a patient in a mental hospital is to become a failure in life                                                                       | To become a patient in FMHCare is to become a failure in life                                                                                     |
|                                                                               |    |   | Although some mental patients seem all right, it is dangerous to forget for a moment that they are mentally ill                               | Although some FMH patients seem all right, it is dangerous to forget for a moment that they are mentally ill                                      |
|                                                                               |    |   | If our hospitals had enough well trained doctors, nurses, and aides, many of the patients would get well enough to live outside the hospital* | If our hospitals had enough well trained doctors, nurses, and aides, many of the FMH patients would get well enough to live outside the hospital* |
|                                                                               |    |   | The best way to handle patients in mental hospitals is to keep them behind locked doors                                                       | The best way to handle FMH patients is to keep them behind locked doors                                                                           |
|                                                                               |    |   | There is little that can be done for patients in a mental hospital except to see that they are comfortable and well fed                       | There is little that can be done for FMH patients in CMHCare except to see that they are comfortable and well fed                                 |
| <b>Public Attitudes Towards Offenders with Mental Illness</b><br>(PATOMI)[17] | 28 | 7 | As soon as an offender shows signs of mental disturbance, he should be hospitalised                                                           | As soon as a FMH patient shows signs of mental disturbance, he should be readmitted to FMHCare                                                    |
|                                                                               |    |   | The best therapy for many offenders with mental illness is to be part of a normal community*                                                  | The best therapy for many FMH patients is to be part of a normal community*                                                                       |
|                                                                               |    |   | Offenders with a mental illness are far less of a danger than most people suppose*                                                            | FMH patients are far less of a danger than most people suppose*                                                                                   |
|                                                                               |    |   | Less emphasis should be placed on protecting the public from FPPs*                                                                            | Less emphasis should be placed on protecting the public from FMH patients*                                                                        |

|                                                                   |    |   |                                                                                                  |                                                                                    |
|-------------------------------------------------------------------|----|---|--------------------------------------------------------------------------------------------------|------------------------------------------------------------------------------------|
|                                                                   |    |   | Increased spending on forensic mental health services is a waste of tax money                    | N/A                                                                                |
|                                                                   |    |   | Offenders with mental illness need the same kind of control and discipline as a young child      | FMH patients need the same kind of control and discipline as a young child         |
|                                                                   |    |   | Offenders with mental illness should be encouraged to assume the responsibilities of normal life | FMH patients should be encouraged to assume the responsibilities of normal life    |
| <b>Prejudice towards People with Mental Illness</b><br>(PPMI)[18] | 28 | 6 | I am not scared of people with mental illness*                                                   | I am not scared of FMH patients*                                                   |
|                                                                   |    |   | People with mental illness should support themselves and not expect handouts                     | FMH patients should support themselves and not expect handouts                     |
|                                                                   |    |   | People with mental illness do not deserve our sympathy                                           | FMH patients do not deserve our sympathy                                           |
|                                                                   |    |   | The behaviour of people with mental illness is unpredictable                                     | The behaviour of FMH patients is unpredictable                                     |
|                                                                   |    |   | In general, you cannot predict how people with mental illness will behave                        | In general, you cannot predict how FMH patients will behave                        |
|                                                                   |    |   | I usually find people with mental illness to be consistent in their behaviour*                   | I usually find FMH patients to be consistent in their behaviour*                   |
| <b>Recovery Knowledge Inventory</b><br>(RKI)[19]                  | 20 | 1 | Not everyone is capable of actively participating in the recovery process                        | Not all FMH patients are capable of actively participating in the recovery process |



|   |                                                                                                       |
|---|-------------------------------------------------------------------------------------------------------|
| b | FMH patients should be visited with more than one professional at the same time, for our own safety   |
|   | Higher doses of psychotropic drugs should be used in FMH patients than non-forensic patients          |
|   | FMH patients have a more violent personality than non-forensic patients with a mental illness         |
|   | FMH patients should not share therapeutic groups or therapeutic activities with non-forensic patients |
|   | It is frightening to think of FMH patients living in the same facility as non-forensic patients       |

N/A – items were included without any modification; <sup>a</sup> selected items resulted in 15 modified items; \* positively formulated items; <sup>b</sup> items created by the authors.

## REFERENCES

1. Baker, J. A., Richards, D. A., & Campbell, M. (2005). *Nursing attitudes towards acute mental health care : development of a measurement tool*. 522–529.
2. Weller, L., & Grunes, S. (1988). Does contact with the mentally ill affect nurses; attitudes to mental illness? *British Journal of Medical Psychology*, 61(3), 277–284. <https://doi.org/10.1111/j.2044-8341.1988.tb02789.x>
3. Melvin, K. B., Gramling, L. K., & Gardner, W. M. (1985). A Scale to Measure Attitudes toward Prisoners. *Criminal Justice and Behavior*, 12(2), 241–253. <https://doi.org/10.1177/0093854885012002006>
4. Madianos, M., Economou, M., Peppou, L. E., Kallergis, G., Rogakou, E., & Alevizopoulos, G. (2012). Measuring public attitudes to severe mental illness in Greece: Development of a new scale. *European Journal of Psychiatry*, 26(1), 55–67. <https://doi.org/10.4321/S0213-61632012000100006>
5. Hirai, M., & Clum, G. A. (2000). Development, reliability, and validity of the beliefs toward mental illness scale. *Journal of Psychopathology and Behavioral Assessment*, 22(3), 221–236. <https://doi.org/10.1023/A:1007548432472>
6. Taylor SM, Dear MJ (1981) Scaling Community Attitudes Toward the Mentally Ill. *Schizophr Bull* 7:225–240
7. Church, W. T., Wakeman, E. E., Miller, S. L., Clements, C. B., & Sun, F. (2008). The community attitudes toward sex offenders scale: The development of a psychometric assessment instrument. *Research on Social Work Practice*, 18(3), 251–259. <https://doi.org/10.1177/1049731507310193>
8. Varas-Díaz, N., Santos-Figueroa, A., Polanco-Frontera, N., Cajigas-Vargas, I., Rivera-Díaz, M., Lugo-Candelas, C. I., Rosario-Hernández, E., & Rivera-Segarra, E. (2012). Desarrollo de una Escala para Medir el Estigma Relacionado a Problemas de Salud Mental en Puerto Rico. *Revista Puertorriqueña de Psicología*, 23.
9. Sastre-Rus, M., Tomás-Sábado, J., Juliá-Sanchis, R., Roldán-Merino, J. F., Puig-Llobet, M., & Lluch-Canut, M. T. (2020). Development and psychometric testing of a scale for assessing the associative stigma of mental illness in nursing. *Journal of Clinical Nursing*, 29(21–22), 4300–4312. <https://doi.org/10.1111/jocn.15467>
10. Chen, H., Wang, Z., & Phillips, M. R. (2017). *Assessing knowledge and attitudes about mental illness in Ningxia , China*. 0(0), 1–26. <https://doi.org/10.1177/1363461517748847>
11. Charles, J. L. K., & Bentley, K. J. (2017). Measuring Mental Health Provider-Based Stigma: Development and Initial Psychometric Testing of a Self-Assessment Instrument. *Community Mental Health Journal*, 0(0), 0. <https://doi.org/10.1007/s10597-017-0137-4>
12. Xu, D., Phillips, M., Xu, D., Shao, G., & Zeng, M. (2002). [Comparison of attitudes on mental illness among doctors and nurses of three psychiatric

- hospitals]. *Chinese Journal of Clinical Psychology*, 10, 52–53. <https://doi.org/10.3969/j.issn.1005-3611.2002.01.021>
13. Kassam A, Glozier N, Leese M, et al (2010) Development and responsiveness of a scale to measure clinicians' attitudes to people with mental illness (medical student version). *Acta Psychiatr Scand* 122:153–161. <https://doi.org/10.1111/j.1600-0447.2010.01562.x>
  14. Gabbidon J, Clement S, van Nieuwenhuizen A, et al (2013) Mental Illness: Clinicians' Attitudes (MICA) Scale-Psychometric properties of a version for healthcare students and professionals. *Psychiatry Res* 206:81–87. <https://doi.org/10.1016/j.psychres.2012.09.028>
  15. Kassam A, Papish A, Modgill G, Patten S (2012) The development and psychometric properties of a new scale to measure mental illness related stigma by health care providers: The opening minds scale for Health Care Providers (OMS-HC). *BMC Psychiatry* 12:1. <https://doi.org/10.1186/1471-244X-12-62>
  16. Cohen J, Struening EL (1962) Opinions about mental illness in the personnel of two large mental hospitals. *J Abnorm Soc Psychol* 64:349–360. <https://doi.org/10.1037/h0045526>
  17. Walkden, S. M., Rogerson, M., & Kola-Palmer, D. (2021). Public Attitudes Towards Offenders with Mental Illness Scale (PATOMI): Establishing a Valid Tool to Measure Public Perceptions. *Community Mental Health Journal*, 57(2), 349–356. <https://doi.org/10.1007/s10597-020-00653-0>
  18. Kenny, A., Bizumic, B., & Griffiths, K. M. (2018). The Prejudice towards People with Mental Illness (PPMI) scale: Structure and validity. *BMC Psychiatry*, 18(1), 1–13. <https://doi.org/10.1186/s12888-018-1871-z>
  19. Bedregal, L. E., Connell, M. O., & Davidson, L. (2003). The Recovery Knowledge Inventory: Assessment of Mental Health Staff Knowledge and Attitudes about Recovery. *Psychiatric Rehabilitation Journal Completed*, 30(2), 96–103.
